# Supplementary material for: Assessing the cataract surgical rate and gender equity in cataract services in south-east Nigeria
Source: PubMed Central journal article supplement — BMJ Open Ophthalmol. 2024 Jul 31;9(1):e001326. doi: 10.1136/bmjophth-2023-001326 (PMC11293407; doi:10.1136/bmjophth-2023-001326), 2024-07-31
Supplement: bmjophth-9-1-s001.pdf [file bmjophth-9-1-s001.pdf]

Data survey tool\_2

**Dear Colleague, Thank you for accepting to participate in this study to determine the Cataract Surgical Rate and Outcomes in Southeast Nigeria. All data will be anonymised and treated confidentially. Kindly fill and return to Ada Aghaji ([aaghaji@yahoo.co.uk](mailto:aaghaji@yahoo.co.uk)) by 30th July 2020. In the age column, please insert real age. Please use drop down box at the extreme right of the relevant rows where applicable. Thank you.**

---

| Initials | serial No | State of residence | LGA of residence | Residence | Date of examination | Entry point | Mode of selection | Date of examination | Age | Gender |
|----------|-----------|--------------------|------------------|-----------|---------------------|-------------|-------------------|---------------------|-----|--------|
|----------|-----------|--------------------|------------------|-----------|---------------------|-------------|-------------------|---------------------|-----|--------|

---
